# Supplementary material
Source: publisher figshare collection journal article supplement (https://future-science-group.figshare.com/articles/dataset/_/23821413)
Supplement: Supplementary file 1 [file 1]

| **Condition** | **Particle Size (nm)** | **PDI** |
| --- | --- | --- |
| Rotary Evaporation | 117.83 ± 1.24 | 0.196 ± 0.008 |
| Overnight stirring | 107.17 ± 1.50 | 0.212 ± 0.012 |
| Combined | 151.57 ± 3.07 | 0.215 ± 0.009 |
